# Supplementary material for: Development of a core outcome set and outcome definitions for studies on uterus-sparing treatments of adenomyosis (COSAR): an international multistakeholder-modified Delphi consensus study
Source: PubMed Central journal article supplement — Hum Reprod. 2022 Jul 30;37(9):2012–31. doi: 10.1093/humrep/deac166 (PMC9433836; doi:10.1093/humrep/deac166), 2022-07-30
Supplement: deac166_supplementary_table_si.pdf [file deac166_supplementary_table_si.pdf]

Supplementary Table S1

| Number of participants from each stakeholder group and countries of residence/practice |           |         |     |            |           |         |     |            |
|----------------------------------------------------------------------------------------|-----------|---------|-----|------------|-----------|---------|-----|------------|
|                                                                                        | Round one |         |     |            | Round two |         |     |            |
|                                                                                        | Patient   | Partner | HCP | Researcher | Patient   | Partner | HCP | Researcher |
| Albania                                                                                | 0         | 0       | 1   | 0          | 0         | 0       | 0   | 0          |
| Argentina                                                                              | 0         | 0       | 2   | 0          | 0         | 0       | 1   | 0          |
| Australia                                                                              | 12        | 0       | 8   | 0          | 6         | 0       | 2   | 1          |
| Austria                                                                                | 1         | 0       | 0   | 1          | 1         | 0       | 1   | 0          |
| Belgium                                                                                | 0         | 0       | 4   | 0          | 0         | 0       | 2   | 1          |
| Brazil                                                                                 | 0         | 0       | 1   | 0          | 0         | 0       | 0   | 0          |
| Bulgaria                                                                               | 1         | 0       | 0   | 0          | 1         | 0       | 0   | 0          |
| Canada                                                                                 | 9         | 0       | 5   | 1          | 9         | 0       | 4   | 1          |
| Chile                                                                                  | 0         | 0       | 1   | 0          | 0         | 0       | 0   | 0          |
| China                                                                                  | 0         | 0       | 1   | 1          | 0         | 0       | 1   | 2          |
| Colombia                                                                               | 0         | 0       | 1   | 0          | 0         | 0       | 1   | 0          |
| Denmark                                                                                | 0         | 0       | 2   | 0          | 0         | 0       | 1   | 0          |
| France                                                                                 | 88        | 4       | 3   | 0          | 45        | 2       | 3   | 0          |
| Germany                                                                                | 5         | 0       | 2   | 1          | 3         | 0       | 0   | 1          |
| Greece                                                                                 | 0         | 0       | 5   | 0          | 0         | 0       | 3   | 0          |
| Hungary                                                                                | 0         | 0       | 2   | 0          | 1         | 0       | 2   | 0          |
| India                                                                                  | 4         | 0       | 2   | 0          | 1         | 0       | 2   | 0          |
| Indonesia                                                                              | 0         | 0       | 3   | 0          | 0         | 0       | 2   | 0          |
| Ireland                                                                                | 2         | 0       | 0   | 0          | 1         | 0       | 0   | 0          |
| Israel                                                                                 | 0         | 0       | 1   | 0          | 0         | 0       | 1   | 0          |
| Italy                                                                                  | 0         | 0       | 4   | 3          | 0         | 0       | 4   | 2          |
| Lithuania                                                                              | 0         | 0       | 1   | 0          | 0         | 0       | 0   | 0          |
| Malaysia                                                                               | 0         | 0       | 5   | 0          | 0         | 0       | 1   | 0          |
| Martinique                                                                             | 1         | 0       | 0   | 0          | 0         | 0       | 0   | 0          |
| Myanmar                                                                                | 0         | 0       | 1   | 0          | 0         | 0       | 1   | 0          |
| Netherlands                                                                            | 2         | 0       | 3   | 1          | 1         | 0       | 2   | 2          |
| New Zealand                                                                            | 1         | 0       | 1   | 0          | 1         | 0       | 1   | 0          |
| Nigeria                                                                                | 1         | 0       | 1   | 0          | 1         | 0       | 0   | 0          |
| Norway                                                                                 | 46        | 2       | 10  | 2          | 29        | 0       | 9   | 0          |
| Pakistan                                                                               | 0         | 0       | 1   | 0          | 0         | 0       | 1   | 0          |
| Peru                                                                                   | 0         | 0       | 1   | 0          | 0         | 0       | 0   | 0          |
| Philippines                                                                            | 0         | 0       | 3   | 0          | 1         | 0       | 2   | 0          |
| Puerto Rico                                                                            | 1         | 0       | 0   | 0          | 1         | 0       | 0   | 0          |
| Romania                                                                                | 0         | 0       | 3   | 0          | 0         | 0       | 3   | 0          |
| Russia                                                                                 | 1         | 0       | 0   | 0          | 0         | 0       | 0   | 0          |
| Serbia                                                                                 | 0         | 0       | 1   | 0          | 0         | 0       | 1   | 0          |
| Slovakia                                                                               | 0         | 0       | 1   | 0          | 0         | 0       | 1   | 0          |
| Slovenia                                                                               | 0         | 0       | 12  | 1          | 0         | 0       | 7   | 1          |
| South Africa                                                                           | 0         | 0       | 2   | 0          | 0         | 0       | 2   | 0          |

(continued)

**Supplementary Table SI Continued**

| Number of participants from each stakeholder group and countries of residence/practice |           |         |            |            |           |         |            |            |
|----------------------------------------------------------------------------------------|-----------|---------|------------|------------|-----------|---------|------------|------------|
|                                                                                        | Round one |         |            |            | Round two |         |            |            |
|                                                                                        | Patient   | Partner | HCP        | Researcher | Patient   | Partner | HCP        | Researcher |
| Spain                                                                                  | 2         | 0       | 2          | 0          | 1         | 0       | 1          | 0          |
| Sri Lanka                                                                              | 0         | 0       | 1          | 0          | 0         | 0       | 1          | 0          |
| Switzerland                                                                            | 6         | 0       | 3          | 2          | 2         | 0       | 4          | 0          |
| Turkey                                                                                 | 0         | 0       | 10         | 0          | 0         | 0       | 6          | 0          |
| United Kingdom                                                                         | 107       | 1       | 38         | 4          | 55        | 0       | 21         | 4          |
| Ukraine                                                                                | 0         | 0       | 1          | 0          | 0         | 0       | 0          | 0          |
| USA                                                                                    | 37        | 0       | 1          | 0          | 20        | 0       | 0          | 0          |
| <b>n</b>                                                                               | 327       | 7       | 150        | 17         | 180       | 2       | 94         | 15         |
| <b>Total n</b>                                                                         |           |         | <b>501</b> |            |           |         | <b>291</b> |            |
